# Supplementary material for: A green closed-loop process for selective recycling of lithium from spent lithium-ion batteries
Source: Royal Society of Chemistry journal article supplement (doi:10.1039/d2gc01811j), 2022-01-01
Supplement: d2gc01811j1.pdf [file d2gc01811j1.pdf]

## Supporting Information

### Green Closed-Loop Process for Selective Recycling of Lithium from Spent

#### Lithium-ion Batteries

Jiahui Hou,<sup>a, ‡</sup> Xiaotu Ma,<sup>a, ‡</sup> Jinzhao Fu,<sup>a</sup> Panawan Vanaphuti,<sup>a</sup> Zeyi Yao,<sup>a</sup> Yangtao Liu,<sup>a</sup> and Zhenzhen Yang,<sup>b</sup>  
Yan Wang<sup>\*a</sup>

a. Department of Mechanical and Materials Engineering, Worcester Polytechnic Institute, 100 Institute Rd., Worcester, MA, 01609, USA

b. Chemical Sciences and Engineering Division, Argonne National Laboratory, Lemont, IL 60439, USA

‡ These authors contribute equally.

\*Correspondence: [yanwang@wpi.edu](mailto:yanwang@wpi.edu)

*15 pages, 6 Figures and 6 Tables*

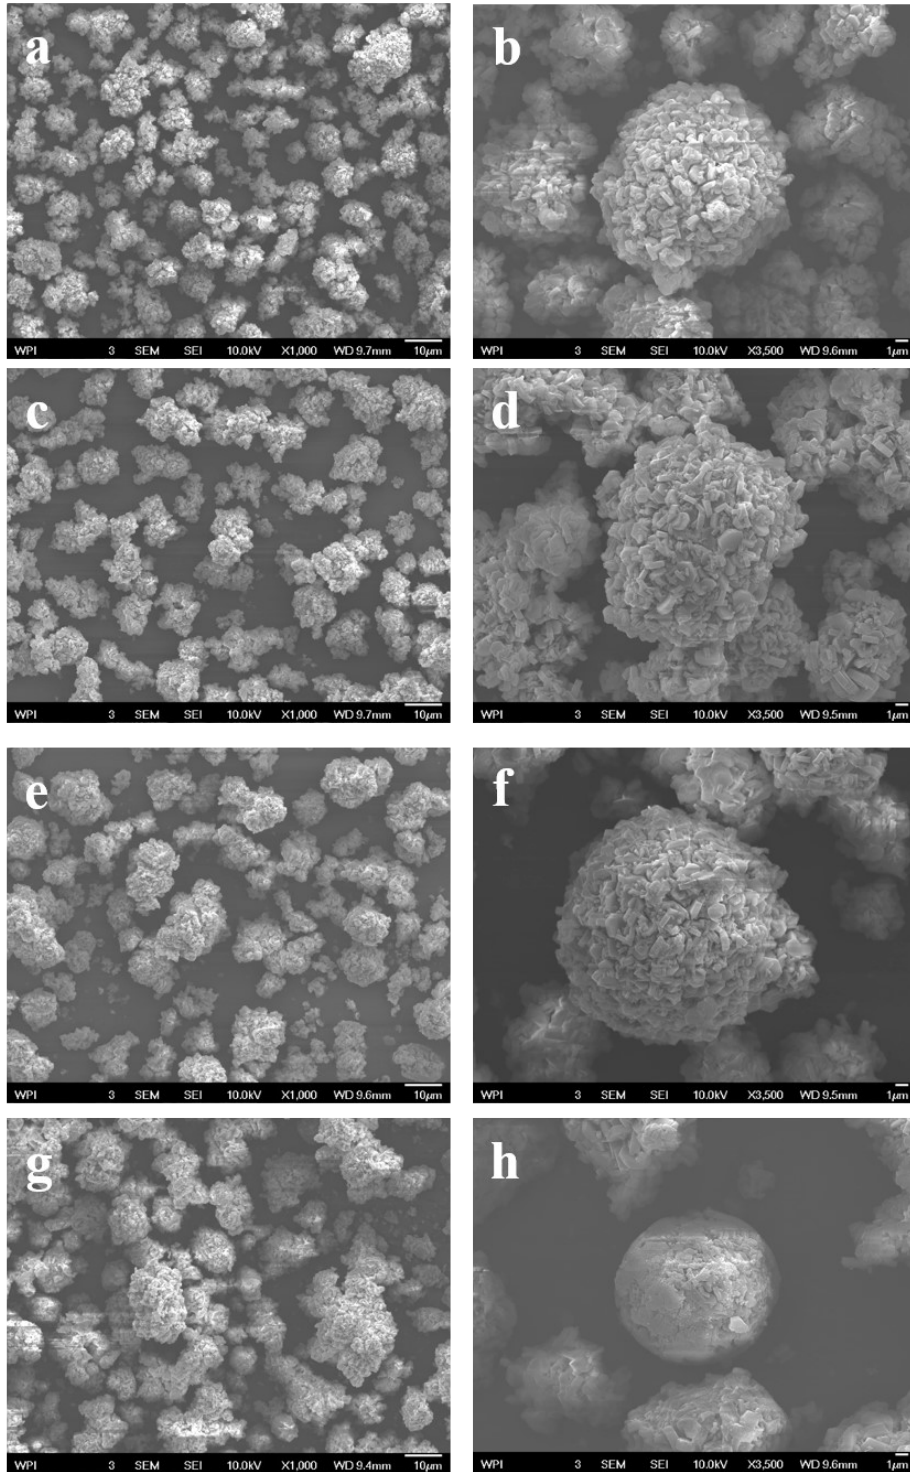

**Figure S1.** Insoluble salt shell formed on the surface of particles as temperature increases; (a) the agglomeration of leached particles at 50°C for 1 hr, (b) the insoluble salt shell formed on the surface of the particles at 50°C for 1 hr, (c) the agglomeration of leached particles at 60°C for 1 hr, (d) the unsoluble salt shell formed on the surface of the particles at 60°C for 1 hr, (e) the agglomeration of leached particles at 70°C for 1 hr, (f) the insoluble salt shell formed on the surface of the particles at 70°C for 1 hr, (g) the agglomeration of leached particles at 80°C for 1 hr, and (h) the insoluble salt shell formed on the surface of the particles at 80°C for 1 hr.

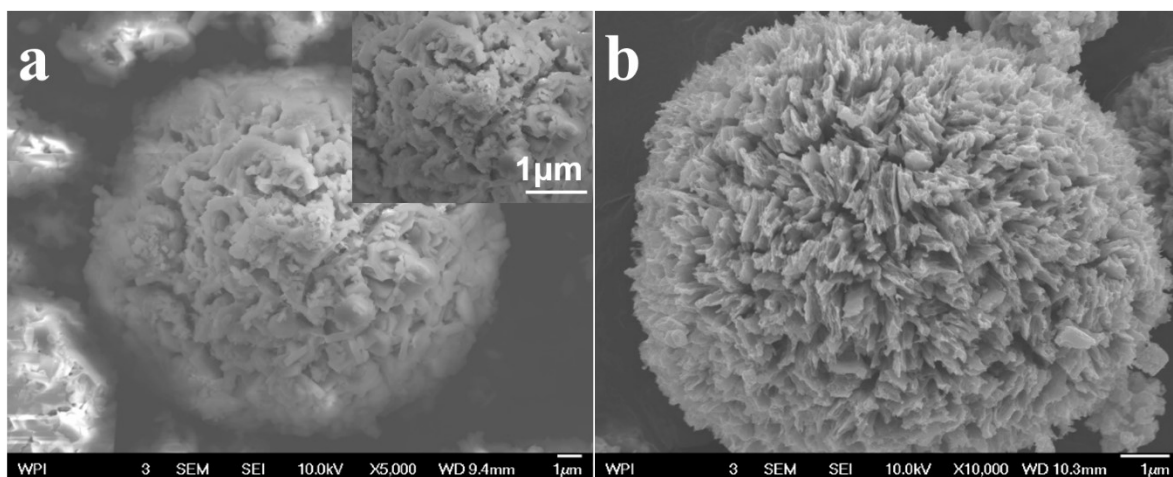

**Figure S2.** The porous structure of particles after leaching treatment; (a) the leached particle after formic acid washed, and(b) the particle after water washed.

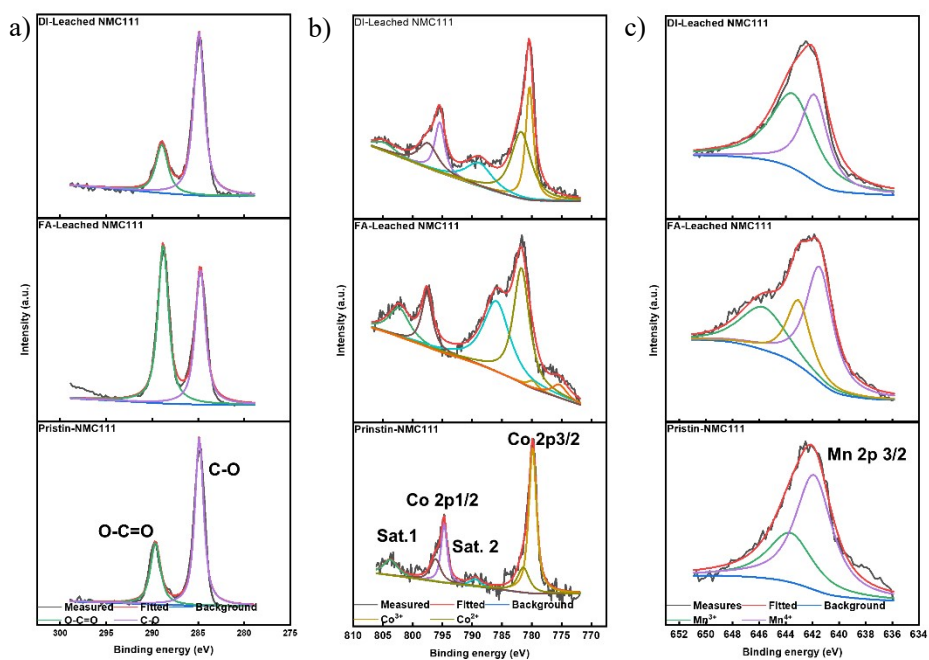

**Figure S3.** (a) C1s valence band for Pristine-NMC111, FA-Leached NMC111, and DI-Leached NMC111, (b) Mn 2p valence band for pristine-NMC111, FA-Leached NMC111, and DI-Leached NMC111, (c) Co 2p valence band for pristine-NMC111, FA-Leached NMC111, and DI-Leached NMC111

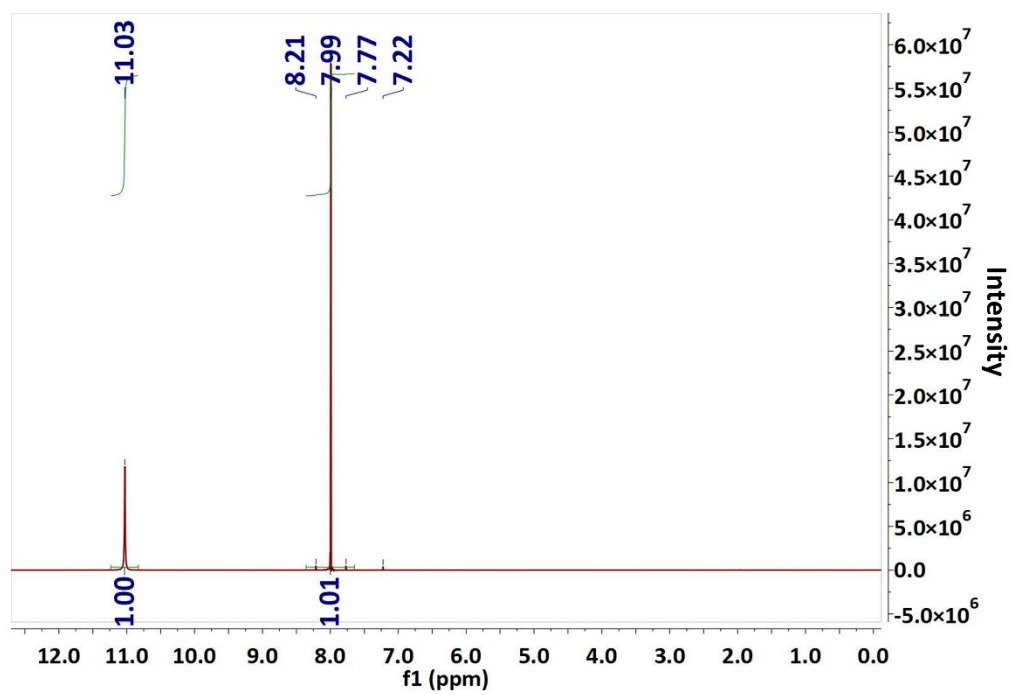

**Figure S4.** <sup>1</sup>H NMR spectra for pure formic acid.

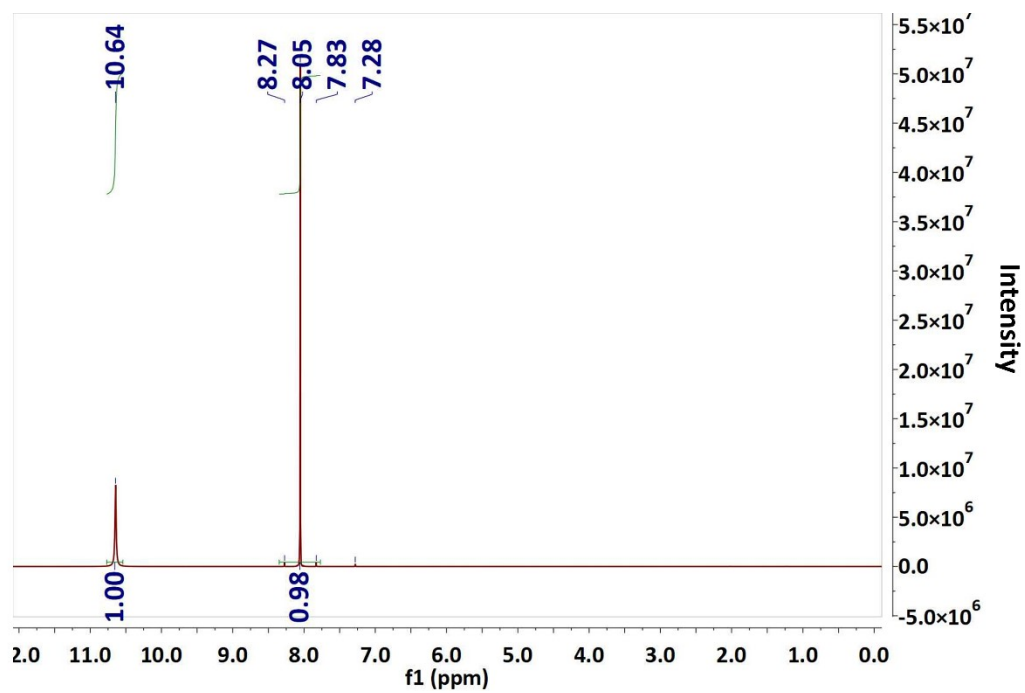

Figure S5.  $^1\text{H}$  NMR spectra for recycled formic acid

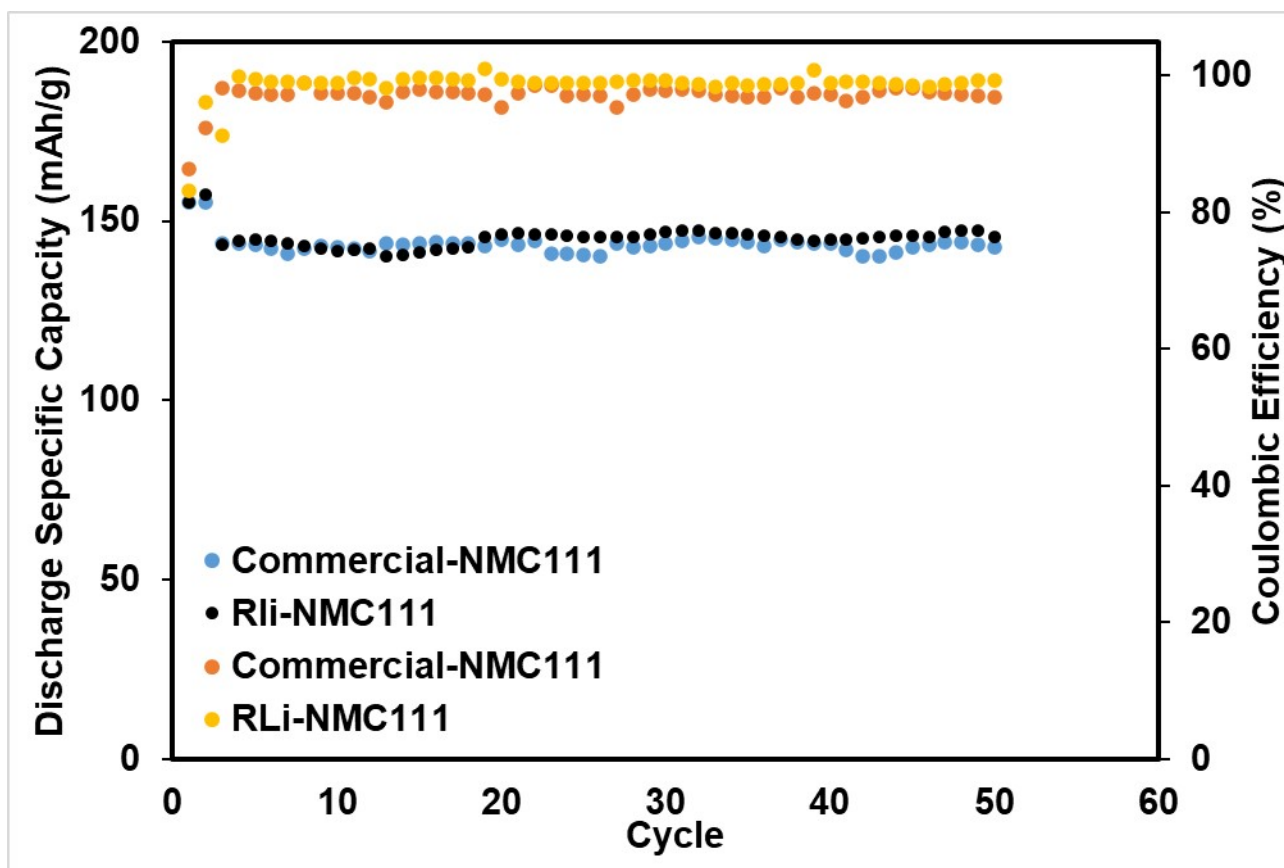

**Figure S6.** Half-cell cycling performance of RLi-NMC111 and TODA-NMC111 at a current density of 1C (1C=155mAh g<sup>-1</sup>)

**Table S1.** Summarized stoichiometric elemental ratio obtained from ICP-OES analysis for different raw materials

| <b>Materials</b> | <b>Li</b> | <b>Ni</b> | <b>Mn</b> | <b>Co</b> |
|------------------|-----------|-----------|-----------|-----------|
| NMC111           | 1         | 0.38      | 0.27      | 0.35      |
| NMC622           | 1         | 0.63      | 0.18      | 0.19      |
| NMC811           | 1         | 0.84      | 0.048     | 0.11      |
| Black mass       | 0.87      | 0.17      | 0.61      | 0.22      |



|                    |         |       |                    |        |       |                    |        |       |
|--------------------|---------|-------|--------------------|--------|-------|--------------------|--------|-------|
| 70°C               | 89.70%  | 2.78% |                    |        |       |                    |        |       |
|                    | 90.06%  | 2.91% |                    |        |       |                    |        |       |
| NMC111             |         |       | NMC622             |        |       | NMC811             |        |       |
|                    | Li      | TMs   |                    | Li     | TMs   |                    | Li     | TMs   |
| 20°C               | 67.50%  | 2.09% | 50°C               | 38.01% | 1.30% | 50°C               | 49.20% | 1.53% |
|                    | 65.83%  | 1.94% |                    | 37.51% | 1.29% |                    | 48.53% | 1.59% |
|                    | 68.51%  | 2.06% |                    | 39.12% | 1.16% |                    | 50.12% | 1.50% |
| Mean               | 67.28%  | 2.03% | Mean               | 38.21% | 1.25% | Mean               | 49.28% | 1.54% |
| Standard Deviation | 1.35%   | 0.08% | Standard Deviation | 0.82%  | 0.08% | Standard Deviation | 0.80%  | 0.05% |
| Standard Error     | 0.78%   | 0.31% | Standard Error     | 0.48%  | 0.04% | Standard Error     | 0.46%  | 0.03% |
| 30°C               | 76.80%  | 2.23% | 60°C               | 66.51% | 1.52% | 60°C               | 86.55% | 2.97% |
|                    | 75.91%  | 2.53% |                    | 65.73% | 1.46% |                    | 88.51% | 2.87% |
|                    | 77.03%  | 2.03% |                    | 67.16% | 1.64% |                    | 85.03% | 3.13% |
| Mean               | 76.58%  | 2.26% | Mean               | 66.47% | 1.54% | Mean               | 86.70% | 2.99% |
| Standard Deviation | 0.59%   | 0.25% | Standard Deviation | 0.72%  | 0.09% | Standard Deviation | 1.74%  | 0.13% |
| Standard Error     | 0.34%   | 0.29% | Standard Error     | 0.41%  | 0.05% | Standard Error     | 1.01%  | 0.08% |
| 40°C               | 82.90%  | 2.48% | 70°C               | 60.41% | 1.10% | 70°C               | 81.42% | 2.59% |
|                    | 81.79%  | 2.59% |                    | 58.61% | 1.01% |                    | 80.43% | 2.51% |
|                    | 83.03%  | 2.31% |                    | 61.26% | 1.22% |                    | 82.65% | 2.66% |
| Mean               | 82.57%  | 2.46% | Mean               | 60.09% | 1.11% | Mean               | 81.50% | 2.59% |
| Standard Deviation | 0.68%   | 0.14% | Standard Deviation | 1.35%  | 0.11% | Standard Deviation | 1.11%  | 0.08% |
| Standard Error     | 0.39%   | 0.35% | Standard Error     | 0.78%  | 0.06% | Standard Error     | 0.64%  | 0.04% |
| 50°C               | 95.00%  | 3.14% | 80°C               | 45.60% | 1.27% | 80°C               | 55.63% | 1.98% |
|                    | 96.06%  | 3.43% |                    | 44.09% | 1.21% |                    | 54.16% | 1.92% |
|                    | 94.25%  | 2.94% |                    | 46.16% | 1.35% |                    | 56.03% | 2.06% |
| Mean               | 95.10%  | 3.17% | Mean               | 45.28% | 1.28% | Mean               | 55.27% | 1.99% |
| Standard Deviation | 0.91%   | 0.25% | Standard Deviation | 1.07%  | 0.07% | Standard Deviation | 0.98%  | 0.07% |
| Standard Error     | 0.53%   | 0.43% | Standard Error     | 0.62%  | 0.04% | Standard Error     | 0.57%  | 0.04% |
| 60°C               | 100.00% | 3.44% |                    |        |       |                    |        |       |
|                    | 100.01% | 3.36% |                    |        |       |                    |        |       |
|                    | 100.03% | 3.51% |                    |        |       |                    |        |       |
| Mean               | 100.01% | 3.44% |                    |        |       |                    |        |       |
| Standard Deviation | 0.02%   | 0.08% |                    |        |       |                    |        |       |
| Standard Error     | 0.01%   | 0.04% |                    |        |       |                    |        |       |

**Table S2. The detailed leaching efficiency and calculated uncertainties for NMC111, NMC622, and NMC811**

|                       |        |       |  |  |  |  |  |  |
|-----------------------|--------|-------|--|--|--|--|--|--|
|                       | 88.95% | 2.69% |  |  |  |  |  |  |
| Mean                  | 89.57% | 2.79% |  |  |  |  |  |  |
| Standard<br>Deviation | 0.57%  | 0.11% |  |  |  |  |  |  |
| Standard Error        | 0.33%  | 0.06% |  |  |  |  |  |  |
| 80°C                  | 87.10% | 2.60% |  |  |  |  |  |  |
|                       | 88.05% | 2.65% |  |  |  |  |  |  |
|                       | 86.56% | 2.53% |  |  |  |  |  |  |
| Mean                  | 87.24% | 2.59% |  |  |  |  |  |  |
| Standard<br>Deviation | 0.75%  | 0.06% |  |  |  |  |  |  |
| Standard Error        | 0.44%  | 0.03% |  |  |  |  |  |  |

**Table S3.** Summarized elemental concentration obtained from ICP-MS analysis for FA-NMC111, DI-NMC111, commercial lithium carbonate, recovered lithium carbonate, and recycled formic acid.

| <b>Materials (ppm)</b>                     | <b>Li</b> | <b>Ni</b> | <b>Mn</b> | <b>Co</b> | <b>Al</b> | <b>Cu</b> | <b>Fe</b> | <b>Mg</b> |
|--------------------------------------------|-----------|-----------|-----------|-----------|-----------|-----------|-----------|-----------|
| FA-NMC111                                  | 2.513     | 131.94    | 109.93    | 94.54     |           |           |           |           |
| DI-NMC111                                  | 0         | 115.15    | 107.53    | 70.26     |           |           |           |           |
| NMC111-leaching solution                   | 1447.76   | 16.16     | 124.03    | 10.14     |           |           |           |           |
| NMC622-leaching solution                   | 1432.18   | 41.42     | 61.21     | 0.17      |           |           |           |           |
| NMC811-leaching solution                   | 1427.01   | 38.61     | 17.17     | 4.85      |           |           |           |           |
| Mixed-leaching solution                    | 2021.85   | 98.47     | 67.21     | 9.85      |           |           |           |           |
| Black mass-leaching solution               | 1299.69   | 133.85    | 47.04     | 89.53     |           |           |           |           |
| Commercial Li <sub>2</sub> CO <sub>3</sub> | 875.5     | 30.5      | 14.2      | 10.4      | 0.5       | 1.3       | 6.3       | 1.5       |
| Recovered Li <sub>2</sub> CO <sub>3</sub>  | 887.3     | 1.6       | 0.3       | 1.7       | 0.4       | 0.2       | 0.1       | 0.0       |
| Commercial formic acid                     | 0.087     | 0.063     | 0.0       | 0.0       | 0.103     | 0.084     | 0.0       | 0.0       |
| Recycled formic acid                       | 0.164     | 0.173     | 0.148     | 0.105     | 0.226     | 0.141     | 0.332     | 0.884     |

**Table S4.** Refinement data of XRD patterns in [Fig. 7](#) using FullProf Suite software with LiTMO<sub>2</sub> as structural model.

| Sample      | A-axis (Å) | C-axis (Å) | Volume (Å <sup>3</sup> ) | Rwp(%) | $\chi^2$ |
|-------------|------------|------------|--------------------------|--------|----------|
| TODA-NMC111 | 2.862      | 14.236     | 100.71                   | 4.35   | 1.91     |
| Rli-NMC111  | 2.861      | 14.234     | 100.31                   | 5.55   | 2.67     |

**Table S5.** Detailed cost for general hydrometallurgical and closed-loop lithium recovery<sup>1</sup>

| <b>Cost items</b>                            | <b>General Hydrometallurgical</b> | <b>A closed-loop lithium recovery</b> |
|----------------------------------------------|-----------------------------------|---------------------------------------|
| ① Direct cost (\$/year) <sup>2</sup>         | 35,566,971                        | 20,222,430                            |
| A. Equipment                                 | 13,028,194                        | 7,145,735                             |
| B. Buildings, process and auxiliary          | 3,257,049                         | 1,786,434                             |
| C. Service facilities and yard improvements  | 6,514,097                         | 4,287,441                             |
| D. Land                                      | 1,042,256                         | 571,659                               |
| ② Indirect cost (\$/year) <sup>3</sup>       | 7,113,394                         | 4,044,486                             |
| A. Engineering and supervision               | 3,556,697                         | 2,022,243                             |
| B. Construction expense and contractor's fee | 3,556,697.05                      | 2,022,243.04                          |
| C. Contingency                               | -                                 | -                                     |
| ③ Fixed capital Investment (\$/year)         | 42,680,365                        | 24,266,916                            |
| ④ Working capital (\$/year)                  | -                                 | -                                     |
| ⑤ Total capital investment (\$/year)         | 42,680,365                        | 24,266,916.5                          |
| ⑥ Manufacturing costs (\$/year) <sup>4</sup> | 18,376,514                        | 21,278,087.88                         |
| A. Direct product costs                      | 9,729,701                         | 16,363,966                            |
| B. Fixed charges                             | 8,646,813                         | 4,914,122                             |
| C. Plant overhead costs                      | -                                 | -                                     |
| ⑦ General expenses (\$/year)                 | -                                 | -                                     |
| ⑧ Total product cost (\$/year) <sup>5</sup>  | 18,376,514                        | 21,248,088                            |
| ⑨ Battery fee (\$/kg black mass)             | 0.2                               | 0.2                                   |
| ⑩ Total Cost of recipient (\$/kg black mass) | 2.25                              | 2.45                                  |

**Table S6.** Summary of condition and result of lithium recycling of waste LIBs investigated in the literature

| <b>Spent materials</b> | <b>Efficiency</b> | <b>Purity</b> | <b>Chemicals</b>                                                                                      | <b>Referenes</b> |
|------------------------|-------------------|---------------|-------------------------------------------------------------------------------------------------------|------------------|
| LIB scraps             | 90.00%            | 99.95%        | HNO <sub>3</sub> , Na <sub>2</sub> CO <sub>3</sub>                                                    | 6                |
| Electrode materials    | 80.00%            | 98.00%        | C, CO <sub>2</sub>                                                                                    | 7                |
| LIB scraps             | 80.00%            | > 98%         | H <sub>2</sub> SO <sub>4</sub> , glucose, Na <sub>2</sub> CO <sub>3</sub>                             | 8                |
| NMC111                 | 94.00%            | /             | H <sub>2</sub> SO <sub>4</sub> , H <sub>2</sub> O <sub>2</sub> , Na <sub>2</sub> CO <sub>3</sub>      | 9                |
| LIB scraps             | 72.00%            | 99.70%        | H <sub>2</sub> SO <sub>4</sub> , H <sub>2</sub> O <sub>2</sub> , Na <sub>2</sub> CO <sub>3</sub>      | 10               |
| LCO                    | 86.20%            | 74.20%        | HCl, Na <sub>2</sub> CO <sub>3</sub>                                                                  | 9                |
| NMC532                 | 81.20%            | > 99.5%       | NH <sub>3</sub> .H <sub>2</sub> O, NH <sub>4</sub> HCO <sub>3</sub> , Na <sub>2</sub> CO <sub>3</sub> | 11               |
| LIB scraps             | 96.30%            | /             | Oxalic acid, Na <sub>2</sub> CO <sub>3</sub>                                                          | 12               |
| LIB scraps             | 91.23%            | 99.00%        | H <sub>2</sub> SO <sub>4</sub> , NaS <sub>2</sub> O <sub>8</sub>                                      | 13               |
| LIB scraps             | 99.8%             | 99.994%       | HCOOH                                                                                                 | This work        |

## References:

1. Dai, Q.; Spangenberg, J. S.; Ahmed, S.; Gaines, L.; Kelly, J. C.; Wang, M. Q. In *EverBatt: A Closed-loop Battery Recycling Cost and Environmental Impacts Model*, 2019.
2. Ahmed, S.; Nelson, P. A.; Gallagher, K. G.; Susarla, N.; Dees, D. W., Cost and energy demand of producing nickel manganese cobalt cathode material for lithium ion batteries. *Journal of Power Sources* **2017**, *342*, 733-740.
3. Caterpillar, Estimating Owning & Operating Costs. Edition 41. **2012**.
4. Hannah Stratton, H. F., Yuting Chen, Camilla Dunham, and Alison Williams, WATER AND WASTEWATER RATE HIKES OUTPACE CPI. **2016**.
5. Dai, Q. K., J.C.; Dunn, J.; Benavides, P. , Update of Bill-of-Materials and Cathode Materials Production for Lithium-Ion Batteries in the GREET Model. **2018a**.
6. Peng, C.; Liu, F.; Wang, Z.; Wilson, B. P.; Lundström, M., Selective extraction of lithium (Li) and preparation of battery grade lithium carbonate (Li<sub>2</sub>CO<sub>3</sub>) from spent Li-ion batteries in nitrate system. *Journal of Power Sources* **2019**, *415*, 179-188.
7. Pindar, S.; Dhawan, N., Carbothermal Reduction of Spent Mobile Phones Batteries for the Recovery of Lithium, Cobalt, and Manganese Values. *JOM* **2019**, *71* (12), 4483-4491.
8. Granata, G.; Moscardini, E.; Pagnanelli, F.; Trabucco, F.; Toro, L., Product recovery from Li-ion battery wastes coming from an industrial pre-treatment plant: Lab scale tests and process simulations. *Journal of Power Sources* **2012**, *206*, 393-401.
9. Chen, W.-S.; Ho, H.-J., Recovery of Valuable Metals from Lithium-Ion Batteries NMC Cathode Waste Materials by Hydrometallurgical Methods. *Metals* **2018**, *8* (5).
10. Atia, T. A.; Elia, G.; Hahn, R.; Altimari, P.; Pagnanelli, F., Closed-loop hydrometallurgical treatment of end-of-life lithium ion batteries: Towards zero-waste process and metal recycling in advanced batteries. *Journal of Energy Chemistry* **2019**, *35*, 220-227.
11. Wang, H.; Huang, K.; Zhang, Y.; Chen, X.; Jin, W.; Zheng, S.; Zhang, Y.; Li, P., Recovery of Lithium, Nickel, and Cobalt from Spent Lithium-Ion Battery Powders by Selective Ammonia Leaching and an Adsorption Separation System. *ACS Sustainable Chemistry & Engineering* **2017**, *5* (12), 11489-11495.
12. Zhang, Y.; Wang, W.; Hu, J.; Zhang, T.; Xu, S., Stepwise Recovery of Valuable Metals from Spent Lithium Ion Batteries by Controllable Reduction and Selective Leaching and Precipitation. *ACS Sustainable Chemistry & Engineering* **2020**, *8* (41), 15496-15506.
13. Lv, W.; Wang, Z.; Zheng, X.; Cao, H.; He, M.; Zhang, Y.; Yu, H.; Sun, Z., Selective Recovery of Lithium from Spent Lithium-Ion Batteries by Coupling Advanced Oxidation Processes and Chemical Leaching Processes. *ACS Sustainable Chemistry & Engineering* **2020**, *8* (13), 5165-5174.
